# Supplementary material
Source: PubMed Central journal article supplement (PMC7544431)

Figure 2c

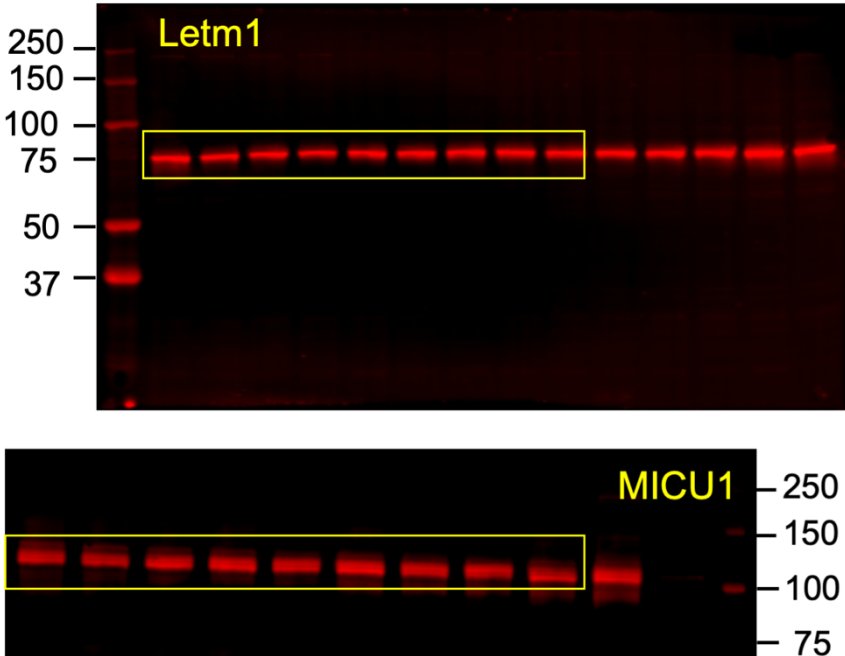

Extended Data Figure 1b

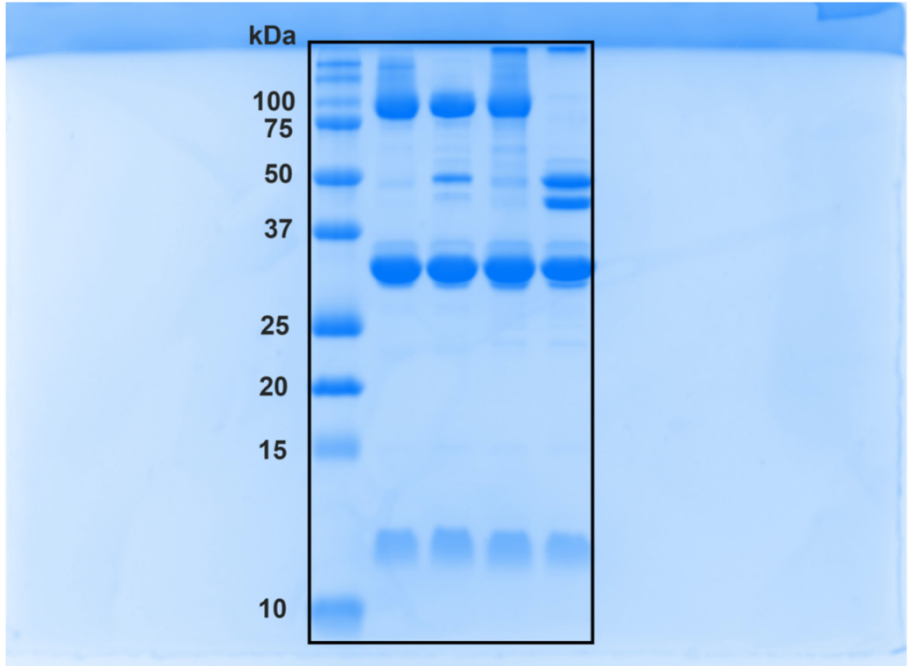

Extended Data Figure 1c (left panel, WT, K114A, K126E, and R129E)

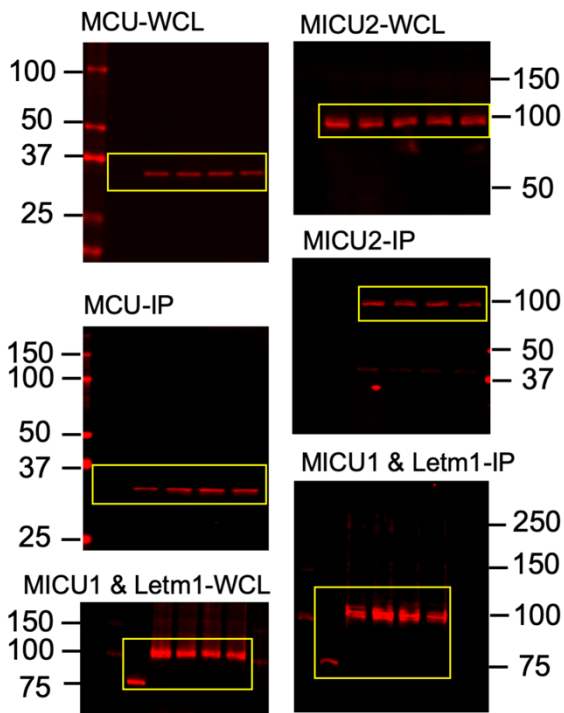

Extended Data Figure 1c (middle panel, WT vs. K126E/R129E)

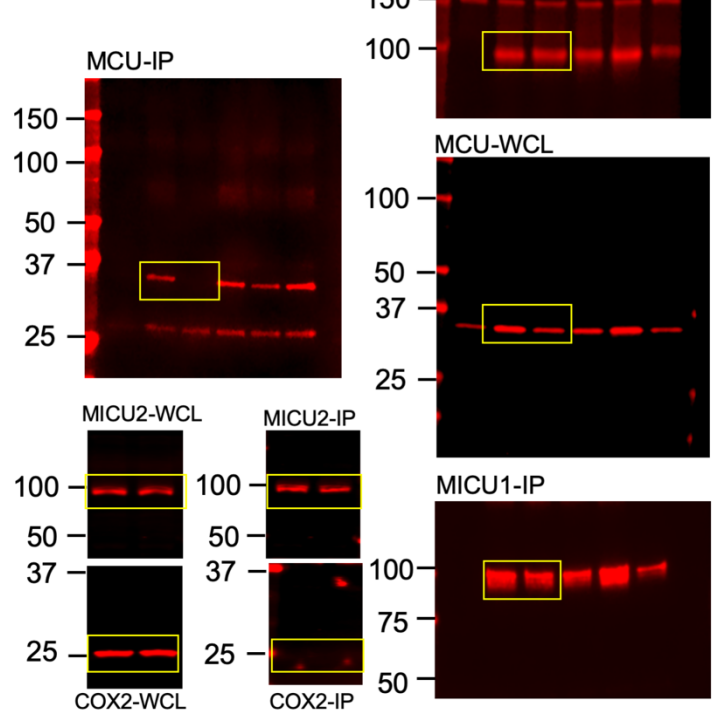

Extended Data Figure 1c (right panel)

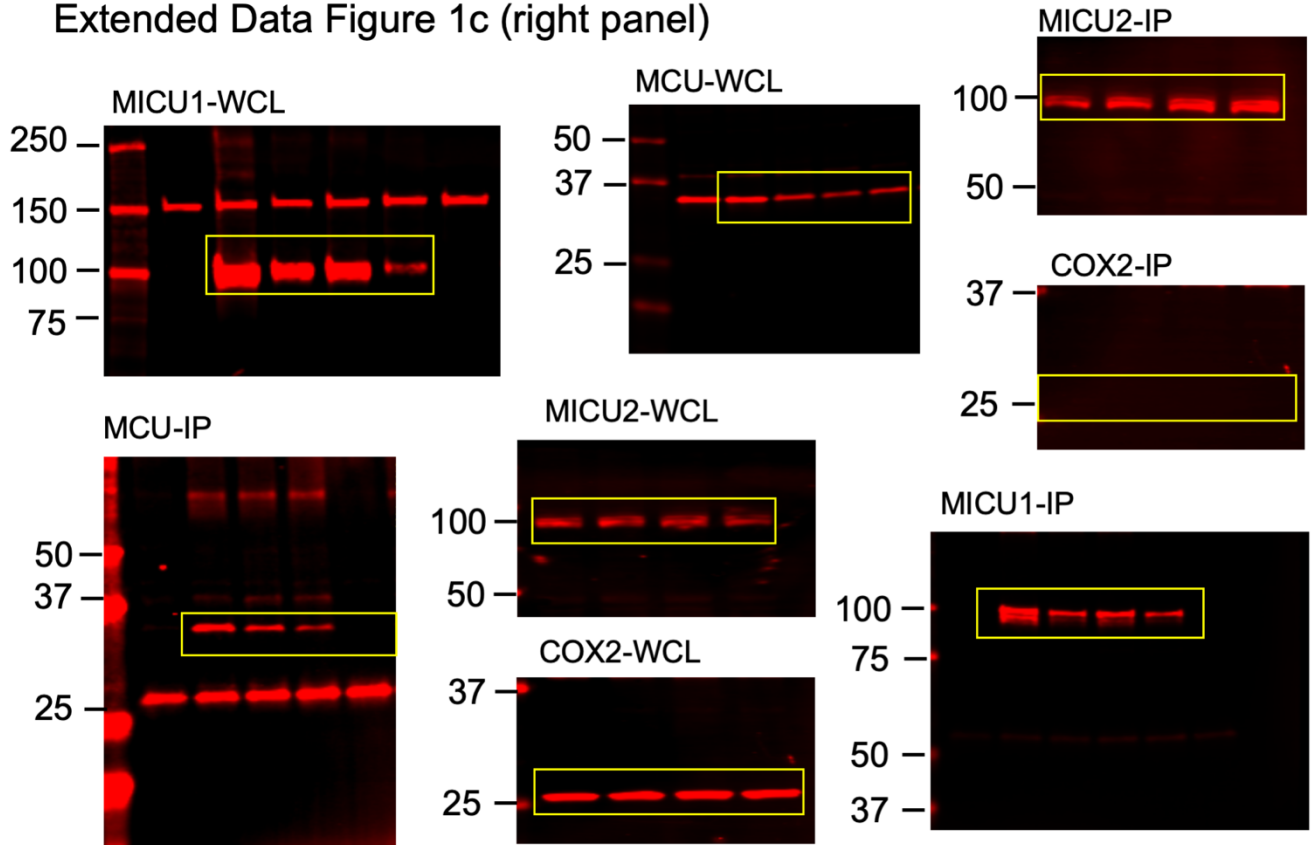

Extended Data Figure 1d

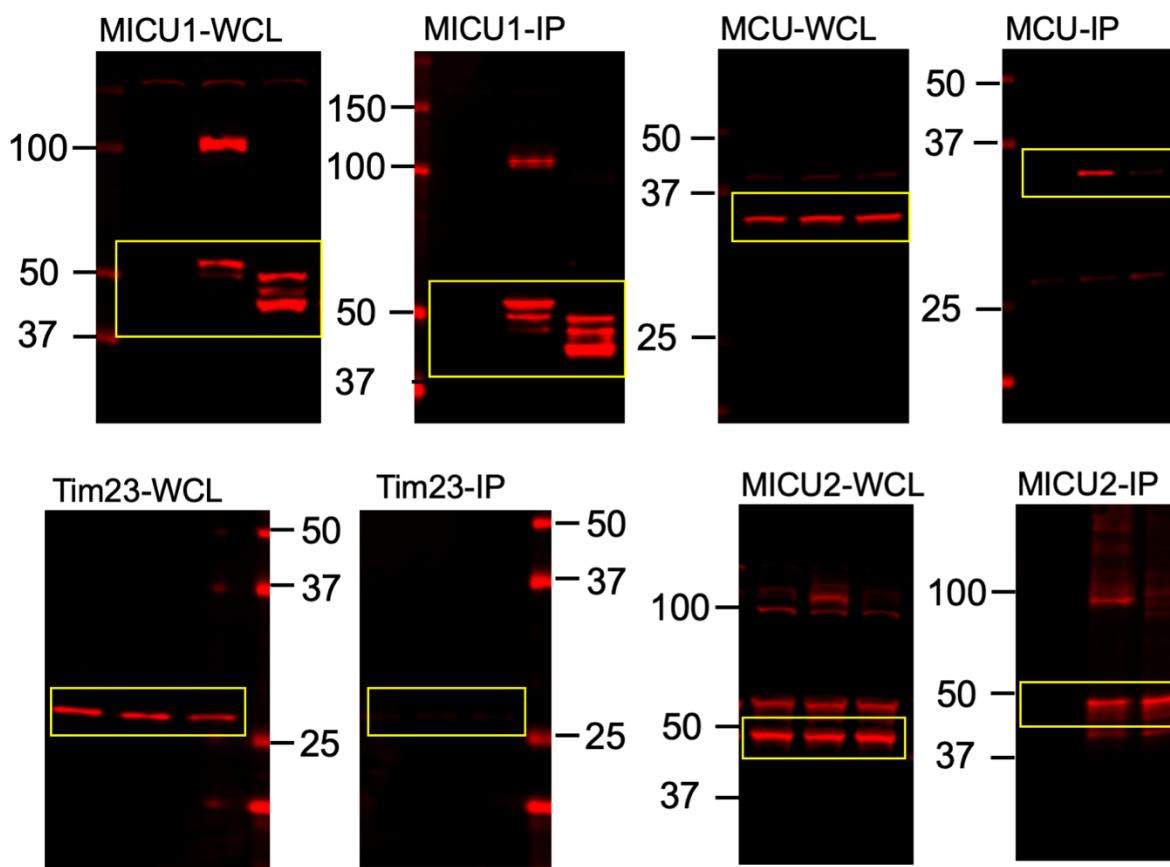

Extended Data Figure 1e

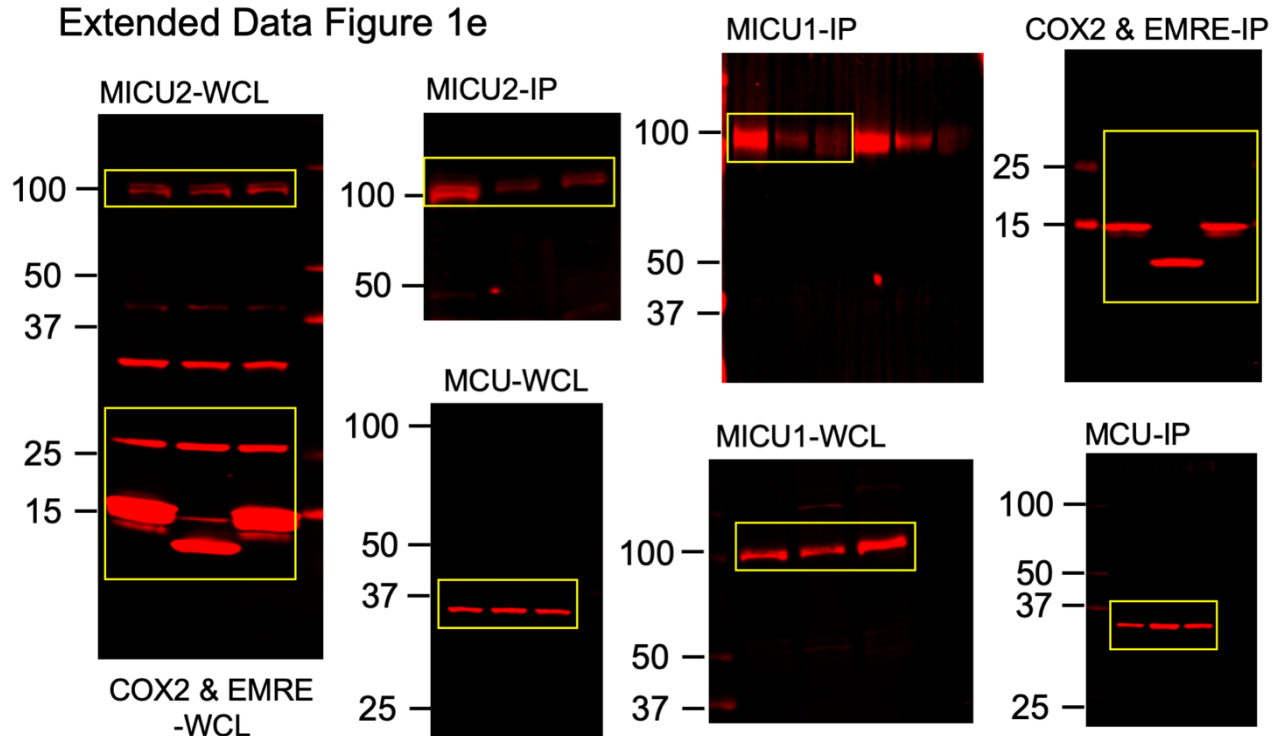

Extended Data Figure 1f

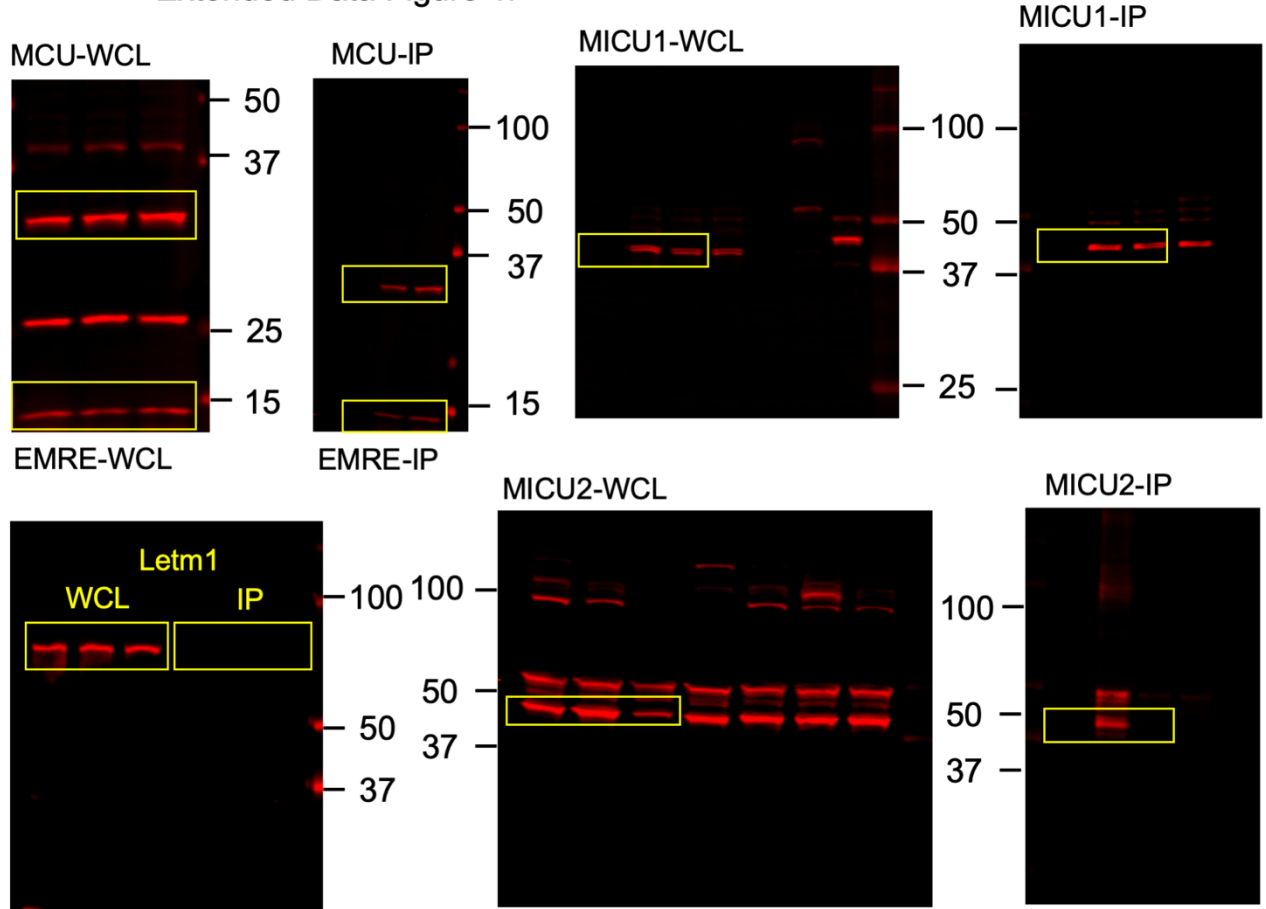

Extended Data Figure 7a

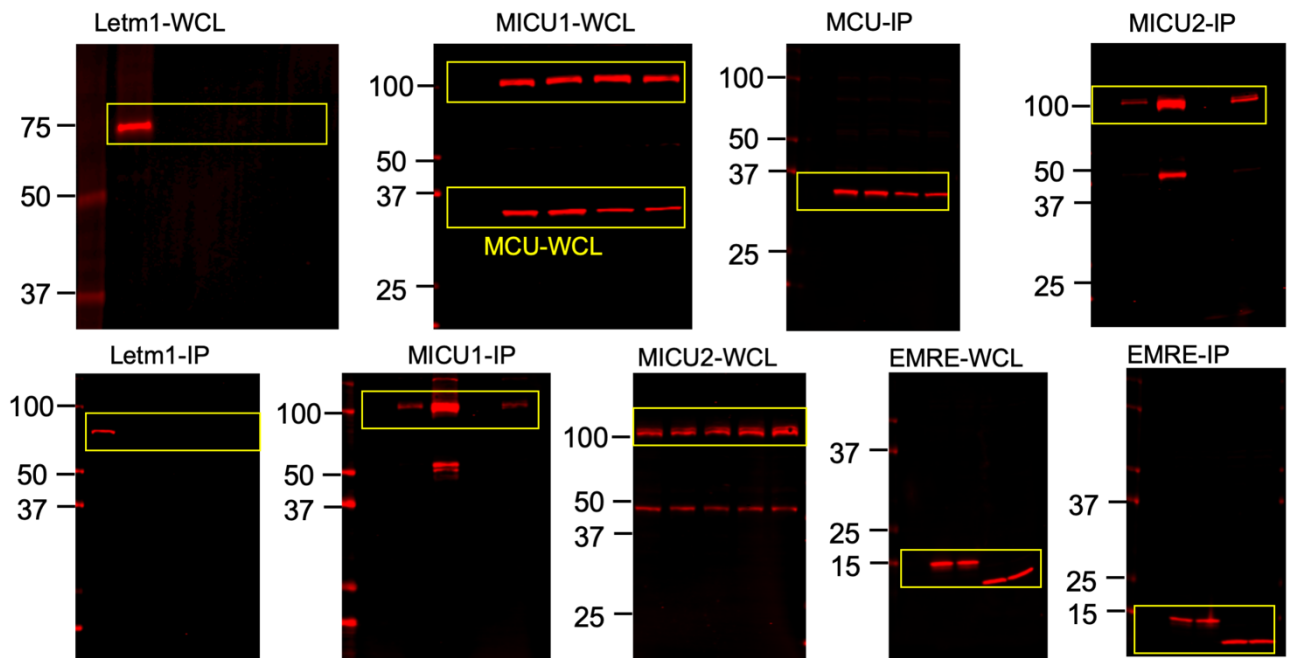

Extended Data Figure 7b

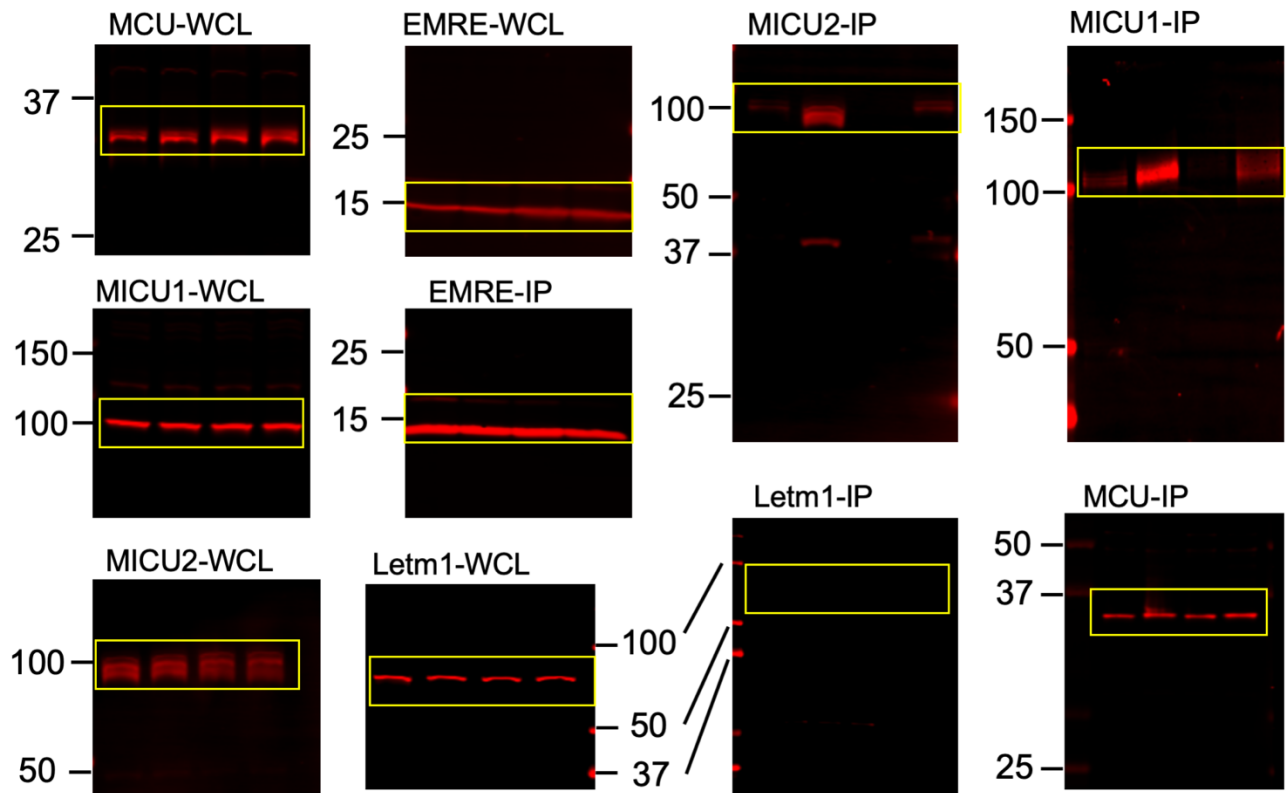

Extended Data Figure 7c

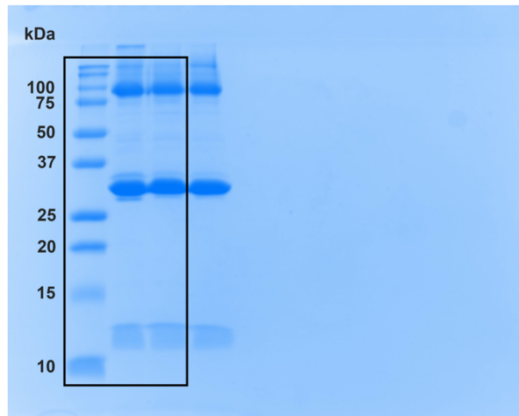

Extended Data Figure 7g

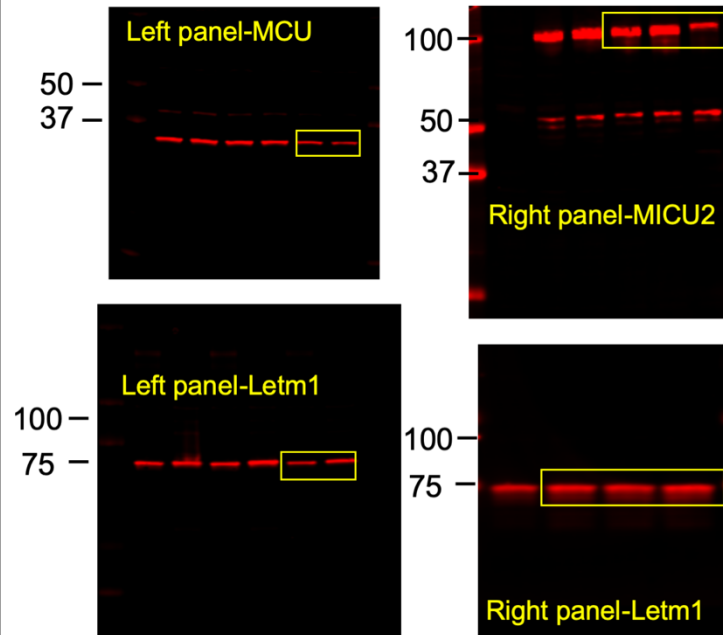

Extended Data Figure 7h

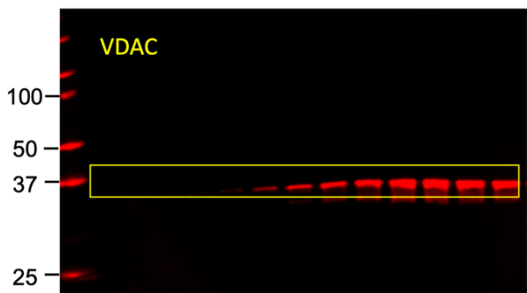

Extended Data Figure 7j

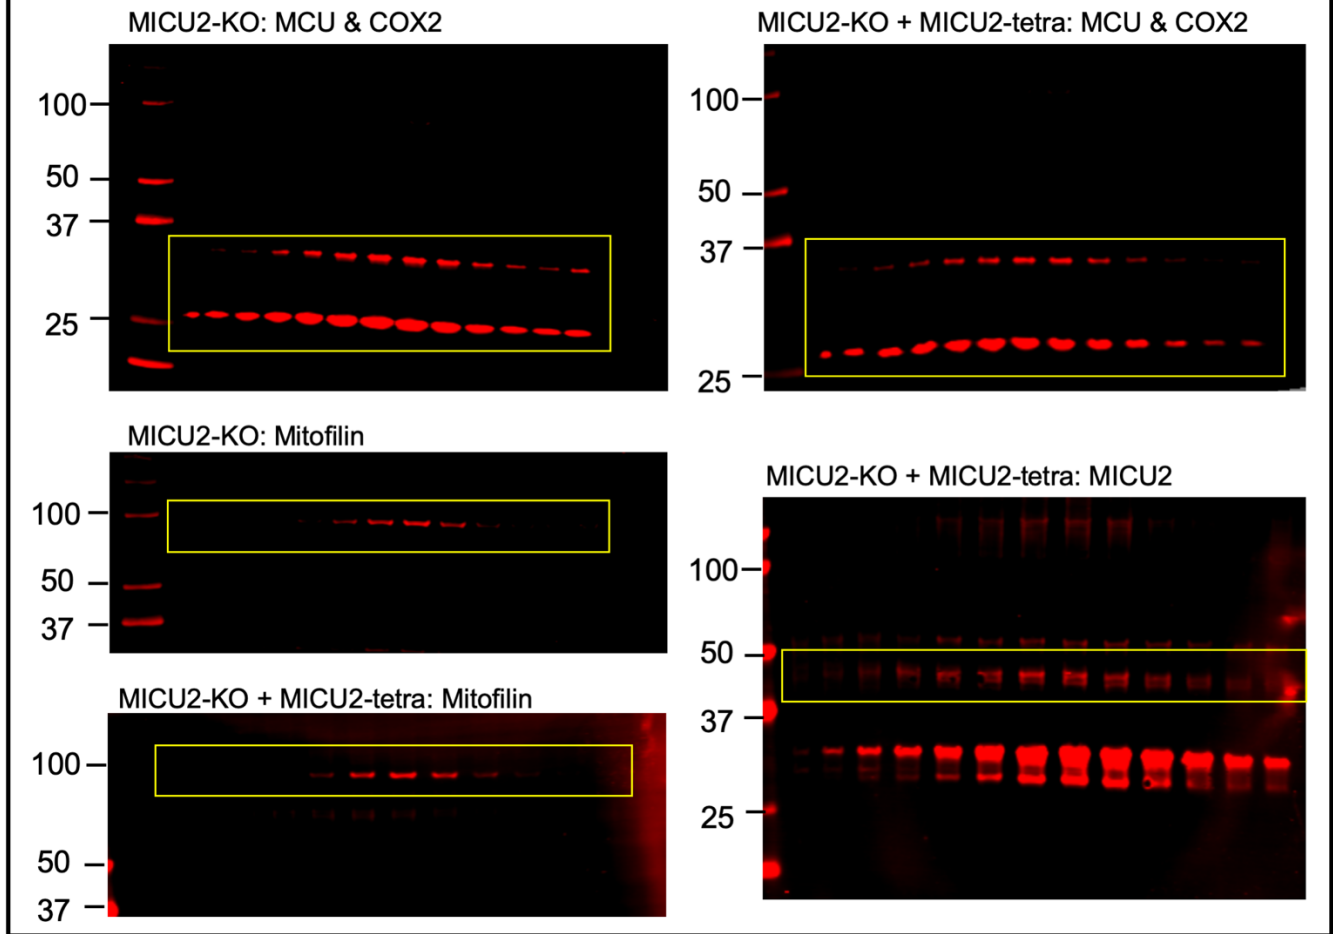

Extended Data Figure 7i

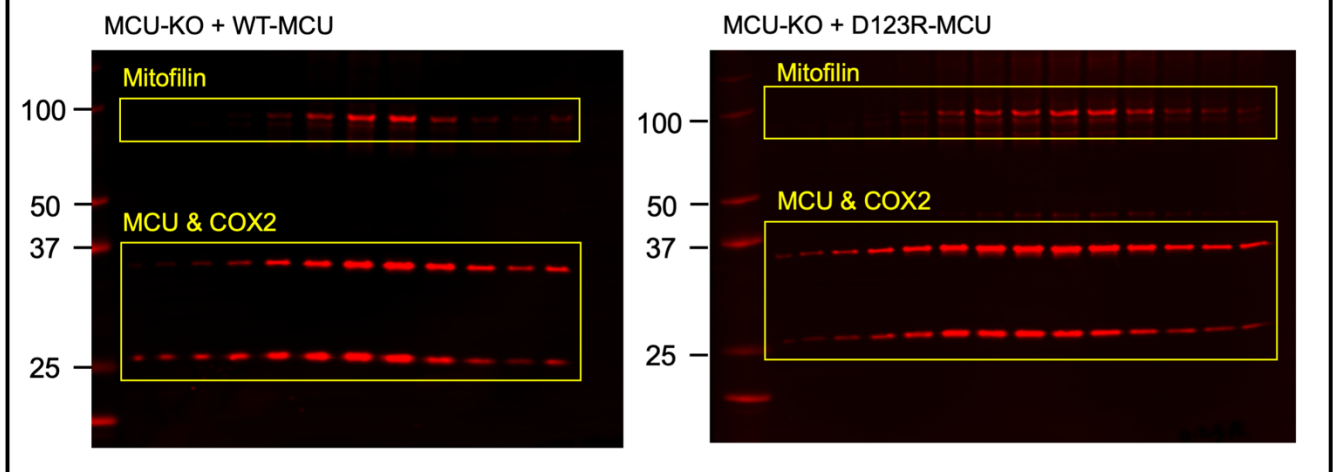

Supplement: NIHMS1614252-supplement-Supplementary_Figure_1.pdf [file NIHMS1614252-supplement-Supplementary_Figure_1.pdf]
